# Supplementary material for: STAT3 Genotypic Variant rs744166 and Increased Tyrosine Phosphorylation of STAT3 in IL-23 Responsive Innate Lymphoid Cells during Pathogenesis of Crohn’s Disease
Source: Hindawi journal article supplement (doi:10.1155/2019/9406146), 2019-06-19
Supplement: f4 [file 9406146.f4.pdf]

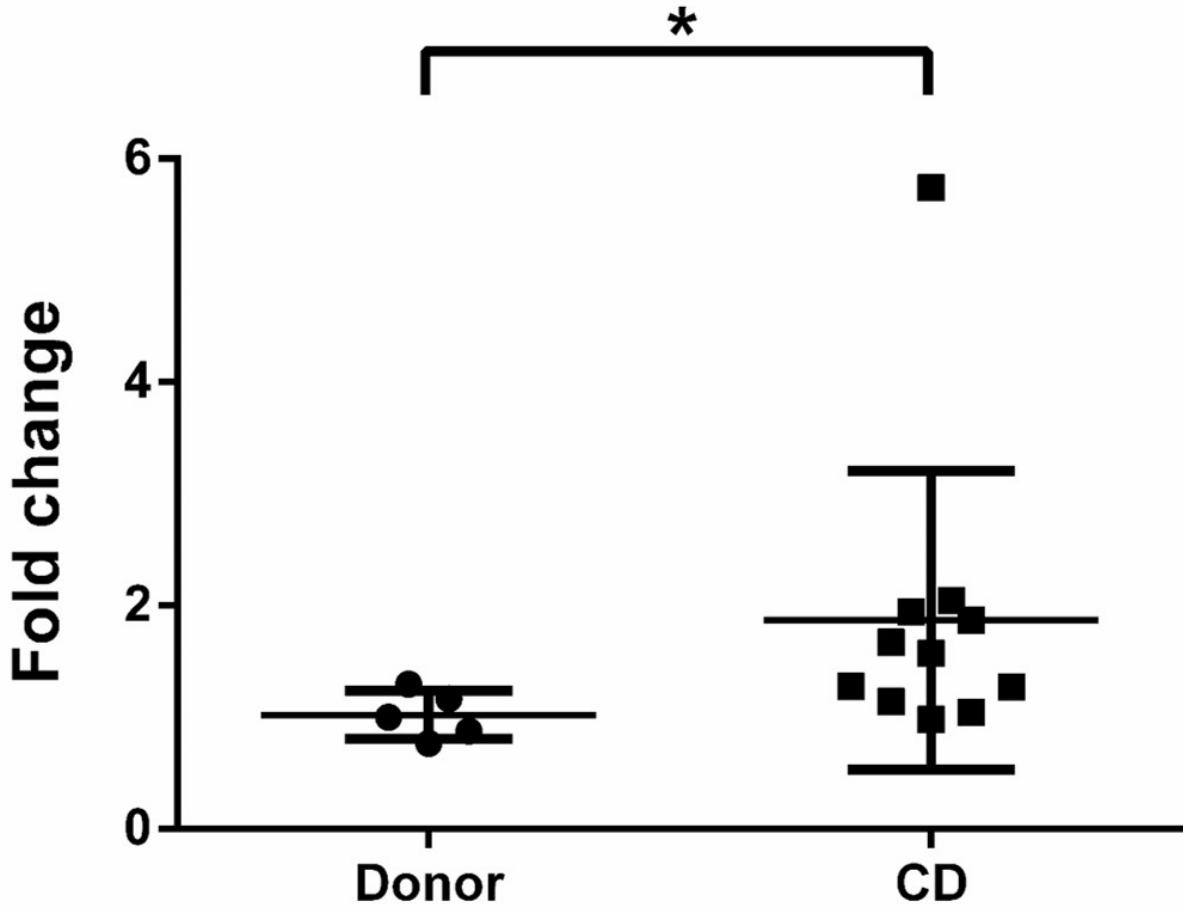

Supplementary Figure 1: Increased level of *stat3* mRNA expression in peripheral blood of Crohn's disease patients (n = 10), compared to healthy donors (n = 5). Unpaired Mann-Whitney *t* test was performed,  $\alpha = 0.05$ .
