# Supplementary material for: STAT3 Genotypic Variant rs744166 and Increased Tyrosine Phosphorylation of STAT3 in IL-23 Responsive Innate Lymphoid Cells during Pathogenesis of Crohn's Disease
Source: J Immunol Res. 2019 Jun 19;2019:9406146. doi: 10.1155/2019/9406146 (PMC6610725; doi:10.1155/2019/9406146)
Supplement: Supplementary 1 — Supplementary Table 1: clinical characteristics of enrolled Crohn's disease patients. [file 9406146.f1.xlsx]

## Sheet: Sheet1
Patient number	Gender	Age at diagonosis	Number of surgeries	Location of Stricture	Location of Fistula	Current Medication	Genotype
1	M	30	1	ileum	ileum	mesalamine	A/A
2	F	7	5	anal	peri-anal	simponi	G/A
3	F	18	5	ileum	N/A	MTX	G/A
4	F	22	0	ileum	ileum	entyvio, xeljanz	G/A
5	M	33	2	ileum	N/A	humira, prednisone	G/A
6	F	22	4	ileum	colon	none	G/A
7	F	23	0	ileum	ileum	cimzia, 6MP	G/G
8	F	13	0	jejunum	N/A	remicade	A/A
9	F	33	1	N/A	rectum	AZA	G/A
10	F	19	0	ileum	N/A	humira, 6MP	A/A
11	M	42	3	ileum	peri-anal	cimzia, mesalamine, entocort	G/A
12	M	16	3	ileum	peri-anal	6MP	A/A
13	F	24	0	N/A	ileum	prednisone	G/A
14	M	14	5	ileum, colon	peri-anal, rectum	entyvio, prednisone	G/A
15	M	28	2	colon	duodenal, colon	remicade, mesalamine	G/A
16	M	49	0	N/A	peri-anal	6MP, mesalamine	G/A
17	F	24	3	duodenum	peri-anal, rectum	AZA	G/A
18	M	44	1	N/A	peri-anal	humira	G/A
19	F	25	3	N/A	peri-anal	MTX	G/A
20	F	13	5	ileum, jejunum	N/A	humira, 6MP	G/A
21	F	19	0	N/A	N/A	AZA, mesalamine	G/A
22	F	54	0	N/A	N/A	none	A/A
23	M	41	0	colon	N/A	mesalamine	A/A
24	M	21	0	N/A	N/A	mesalamine	A/A
25	M	18	3	N/A	peri-anal	prednisone	A/A
26	F	24	4	ileum	ileum	remicade	A/A
27	F	30	1	N/A	N/A	none	G/A
28	M	59	0	ileum, jejunum	N/A	6MP, mesalamine	G/G
29	M	38	0	N/A	N/A	AZA	G/A
30	M	30	0	N/A	N/A	6MP	A/A
31	F	10	2	ileum	ileum	6MP, mesalamine, cimzia	A/A
32	M	10	0	N/A	N/A	remicade, AZA	A/A
33	F	28	0	N/A	N/A	mesalamine	A/A
34	F	36	0	N/A	rectum, peri-anal	remicade, 6MP, prednisone	G/A
35	F	17	0	ileum, anus	N/A	remicade	G/A
36	F	19	0	N/A	N/A	balsalazide	G/G
37	M	22	0	N/A	N/A	pentasa	G/A
38	F	17	1	ileum	anal	none	A/A
39	F	8	1	N/A	N/A	methotrexate	G/G
40	F	55	0	N/A	N/A	asacol	G/A
41	F	29	0	N/A	colovaginal	imuran	A/A
42	F	32	1	ileocecal	peri-anal	Stelara	A/A
43	M	34	1	ileum	peri-anal	Humira, Azathioprine	G/A
44	F	30	3	ileum	N/A	Humira	A/A
45	M	33	2	N/A	N/A	none	G/A
46	M	11	4	ileum	N/A	humira, AZA	G/A
47	M	54	0	colon	N/A	AZA	G/A
48	M	19	0	anal	peri-rectal	humira	G/A
49	F	18	2	ileum	peri-anal	remicade	G/A
50	F	28	2	ileum	N/A	AZA	A/A
51	F	20	2	ileum, colon	ileum, rectum	tysabri	G/A
52	M	33	2	ileum	N/A	humira, prednisone	A/A
53	F	27	0	ileum	N/A	LDN	G/G
54	F	25	4	colon	rectum	AZA	A/A
55	F	39	1	N/A	rectum	none	A/A
56	F	38	0	N/A	N/A	humira, MTX	G/G
57	F	24	0	ileum	N/A	mesalamine	A/A
58	F	23	1	colon	peri-anal, ileum	humira, AZA	A/A
59	M	13	0	N/A	N/A	humira, mesalamine	A/A
60	F	20	0	N/A	N/A	mesalamine	A/A
61	M	19	1	ileum	ileum, rectum, peri-anal	remicade	G/A
62	F	13	5	N/A	rectum, peri-anal	remicade, AZA	A/A
63	F	25	0	ileum	N/A	remicade	G/A
64	M	16	2	ileum	peri-anal, ileum, colon	remicade	A/A
65	F	25	4	N/A	peri-anal, rectum	AZA, humira, mesalamine	G/A
66	F	20	1	colon	rectum	xeljanz	A/A
67	F	48	0	N/A	N/A	remicade	G/A
68	F	32	0	N/A	rectum	tysabri	G/G
69	F	22	0	N/A	N/A	cimzia	G/G
70	F	38	1	ileum	ileum	MTX, entyvio	G/A
71	M	16	4	N/A	N/A	Entocort, LDN, Remicade	A/A
72	M	18	1	N/A	N/A	entyvio	A/A
73	F	72	0	ileum	peri-anal	imuran	A/A
74	F	42	5	colon	N/A	Entyvio	A/A
75	F	63	3	anal	N/A	remicade	G/A
76	M	44	1	ileum	N/A	Entyvio	A/A
77	F	32	1	N/A	N/A	prednisone	G/A
78	F	32	0	N/A	peri-anal, rectum	remicade and azathiopurine	G/G
79	F	25	0	ileum	duodenal, colon	Stelara	G/G
80	M	25	6	ileum	N/A	Stelara and azathioprine	A/A
81	M	24	1	colon	rectum	Stelara and azathioprine	A/A
82	F	35	3	ileum	N/A	Stelara	A/A
83	F	20	1	anal	peri-anal, ileum, colon	Tysabri	G/A
84	F	40	1	N/A	ileum	remicade	G/G
85	M	23	1	N/A	N/A	prednisone	G/G
86	M	37	2	N/A	peri-anal	Entyvio	A/A
87	F	57	2	ileum	N/A	Entyvio	A/A
88	F	46	1	ileum	ileum, colon	Humira and azathioprine	G/A
89	M	42	4	anal	N/A	remicade	G/A
90	M	58	1	N/A	N/A	Lialda	A/A
91	F	60	4	N/A	peri-anal	Entyvio	G/A
92	M	28	1	ileum	N/A	remicade and azathiopurine	A/A
93	M	24	3	N/A	peri-anal	azathioprine	G/A
94	F	31	1	ileum	N/A	Entyvio	A/A
