# Supplementary material for: STAT3 Genotypic Variant rs744166 and Increased Tyrosine Phosphorylation of STAT3 in IL-23 Responsive Innate Lymphoid Cells during Pathogenesis of Crohn's Disease
Source: J Immunol Res. 2019 Jun 19;2019:9406146. doi: 10.1155/2019/9406146 (PMC6610725; doi:10.1155/2019/9406146)
Supplement: Supplementary 2 — Supplementary Table 2: list of human immune response genes. [file 9406146.f2.xlsx]

## Sheet: Sheet1
Gene Symbol	Assay ID
18S	Hs99999901_s1
GAPDH	Hs99999905_m1
HPRT1	Hs99999909_m1
GUSB	Hs99999908_m1
IL1A	Hs00174092_m1
IL1B	Hs00174097_m1
IL2	Hs00174114_m1
IL3	Hs00174117_m1
IL4	Hs00174122_m1
IL5	Hs00174200_m1
IL6	Hs00174131_m1
IL7	Hs00174202_m1
IL8	Hs00174103_m1
IL9	Hs00174125_m1
IL10	Hs00174086_m1
IL12A	Hs00168405_m1
IL12B	Hs00233688_m1
IL13	Hs00174379_m1
IL15	Hs00174106_m1
IL17A	Hs00174383_m1
IL18	Hs00155517_m1
CCL3	Hs00234142_m1
CCL19	Hs00171149_m1
CCL2	Hs00234140_m1
CCL5	Hs00174575_m1
CCR2	Hs00174150_m1
CCR4	Hs99999919_m1
CCR5	Hs00152917_m1
CCR7	Hs00171054_m1
CXCR3	Hs00171041_m1
CXCL10	Hs00171042_m1
CXCL11	Hs00171138_m1
CSF1	Hs00174164_m1
CSF2	Hs00171266_m1
CSF3	Hs00357085_g1
STAT3	Hs00234174_m1
NFKB2	Hs00174517_m1
IKBKB	Hs00233284_m1
CD3E	Hs00167894_m1
CD4	Hs00181217_m1
CD8A	Hs00233520_m1
CD19	Hs00174333_m1
IL2RA	Hs00166229_m1
CD28	Hs00174796_m1
CD38	Hs00233552_m1
CD40	Hs00374176_m1
PTPRC	Hs00365634_g1
CD68	Hs00154355_m1
CD80	Hs00175478_m1
CD86	Hs00199349_m1
CTLA4	Hs00175480_m1
CD40LG	Hs00163934_m1
HLA-DRA	Hs00219575_m1
HLA-DRB1	Hs99999917_m1
TBX21	Hs00203436_m1
TNFRSF18	Hs00188346_m1
ICOS	Hs00359999_m1
NOS2	Hs00167248_m1
BCL2	Hs00153350_m1
BCL2L1	Hs00169141_m1
BAX	Hs00180269_m1
ICAM1	Hs00164932_m1
SELP	Hs00174583_m1
SELE	Hs00174057_m1
HMOX1	Hs00157965_m1
PTGS2	Hs00153133_m1
LRP2	Hs00189742_m1
CYP1A2	Hs00167927_m1
CYP7A1	Hs00167982_m1
IFNG	Hs00174143_m1
PRF1	Hs00169473_m1
GZMB	Hs00188051_m1
GNLY	Hs00246266_m1
FAS	Hs00163653_m1
FASLG	Hs00181225_m1
TGFB1	Hs00171257_m1
SMAD3	Hs00232222_m1
SMAD7	Hs00178696_m1
SKI	Hs00161707_m1
FN1	Hs00365052_m1
C3	Hs00163811_m1
TNF	Hs00174128_m1
LTA	Hs00236874_m1
ACE	Hs00174179_m1
VEGFA	Hs00173626_m1
CD34	Hs00156373_m1
AGTR1	Hs00241341_m1
AGTR2	Hs00169126_m1
EDN1	Hs00174961_m1
LIF	Hs00171455_m1
LY96	Hs00209771_m1
MIF	Hs00236988_g1
NFATC3	Hs00190046_m1
NFATC4	Hs00190037_m1
PF4	Hs00236998_m1
SYK	Hs00374292_m1
