# Supplementary material for: STAT3 Genotypic Variant rs744166 and Increased Tyrosine Phosphorylation of STAT3 in IL-23 Responsive Innate Lymphoid Cells during Pathogenesis of Crohn's Disease
Source: J Immunol Res. 2019 Jun 19;2019:9406146. doi: 10.1155/2019/9406146 (PMC6610725; doi:10.1155/2019/9406146)
Supplement: Supplementary 3 — Supplementary Table 3: quantitative expression levels of human immune response genes. [file 9406146.f3.xlsx]

## Sheet: Sheet1
	Sample ID
Gene name	1	2	3	4	5	6
IL1A	1	5.132	3.48	27.002	8.89	1157.93
IL1B	1	5.617	2.511	55.068	7.59	1186.39
IL2	1	2.163	3.971	1.18	1.32	0.767
IL6	1	9.823	0.865	54.111	8.34	14.163
IL7	1	1.717	3.64	1.53	0.949	0.309
IL8	1	4.34	1.602	96.428	20.552	1794.63
IL10	1	2.968	3.024	16.737	8.169	13.097
IL12A	1	5.481	3.591	6.522	5.28	8.796
IL12B	1	1.889	11.866	1.636	1.81	23.935
IL13	1	0.109	0.929	14.015	2.06	1.376
IL15	1	1.348	3.632	0.901	2.075	1.314
IL17A	1	3.27	3.028	2.937	4.2	3.429
IL18	1	0.825	0.765	0.988	0.267	0.189
CCL3	1	11.781	12.089	48.636	27.68	19.135
CCL19	1	4.909	5.533	1.54	51.35	3.69
CCL2	1	4.09	2.965	24.695	9.55	18.132
CCL5	1	3.604	5.839	2.247	4.282	0.895
CCR2	1	2.041	3.453	3.04	7.344	9.665
CCR4	1	3.263	4.888	6.032	18.568	35.329
CCR5	1	3.109	2.571	2.802	6.085	3.261
CCR7	1	6.627	6.933	2.092	36.71	37.332
CXCR3	1	1.114	1.396	0.921	1.421	0.98
CXCL10	1	0.757	0.497	0.773	0.751	12.991
CXCL11	1	0.433	0.869	0.533	0.641	4.371
CSF1	1	3.978	4.442	7.318	6.675	1.757
CSF2	1	1.749	4.357	6.932	5.073	98.842
CSF3	1	4.16	0.182	8.912	2.871	74.647
STAT3	1	1.721	1.783	1.884	2.37	1.141
NFKB2	1	6.354	6.788	7.639	8.69	20.979
IKBKB	1	3.1	3.967	2.828	3.668	3.18
CD3E	1	2.51	1.498	0.526	6.133	2.746
CD4	1	4.464	3.511	5.187	4.341	3.114
CD8A	1	2.358	2.254	0.897	3.701	0.667
CD19	1	16.745	17.411	1.604	34.269	104.782
IL2RA	1	3.824	1.1	3.654	3.667	9.049
CD28	1	4.188	7.193	5.898	20.641	15.053
CD38	1	1.44	1.57	2.948	4.926	3.757
CD40	1	3.681	3.685	2.965	5.749	7.703
PTPRC	1	3.546	6.011	3.858	6.428	20.735
CD68	1	1.126	1.125	1.071	0.374	0.348
CD80	1	5.574	4.93	4.31	10.365	104.075
CD86	1	1.893	1.231	3.505	1.026	11.254
CTLA4	1	4.254	3.512	6.266	12.618	41.175
CD40LG	1	6.128	10.07	3.868	7.667	3.677
HLA-DRA	1	0.995	1.445	2.01	0.738	1.405
TBX21	1	3.638	6.164	3.582	7.297	4.364
TNFRSF18	1	1.68	0.92	0.877	3.899	6.634
ICOS	1	4.068	12.705	6.841	22.503	48.636
NOS2	1	1.697	0.943	3.25	1.143	0.08
BCL2	1	3.33	3.236	2.281	2.615	1.28
BCL2L1	1	0.955	1.297	0.733	1.144	0.455
BAX	1	1.462	1.693	1.053	1.207	0.579
ICAM1	1	5.2	3.467	18.749	7.975	41.024
SELP	1	6.221	9.392	10.656	9.135	23.352
SELE	1	84.54	8.554	301.551	22.952	1263.48
HMOX1	1	0.496	0.705	0.719	0.314	0.155
PTGS2	1	10.825	20.668	209.456	42.936	39.896
LRP2	1	0.853	0.765	0.097	0.77	1.541
CYP7A1	1	2.137	60.484	8.067	4.396	5.324
IFNG	1	4.548	7.062	8.493	20.647	61.237
PRF1	1	1.852	1.529	1.72	4.529	1.783
GZMB	1	0.908	0.217	0.808	4.169	7.104
GNLY	1	0.432	0.414	0.493	0.479	1.149
FAS	1	2.398	2.179	2.658	3.31	4.416
FASLG	1	2.888	3.831	2.474	4.97	3.141
TGFB1	1	3.432	4.627	4.14	6.105	3.312
SMAD3	1	1.964	2.304	2.305	1.564	0.504
SMAD7	1	1.518	2.171	1.69	1.143	0.719
SKI	1	3.551	4.724	3.813	5.415	0.932
FN1	1	12.488	15.448	13.331	28.066	5.029
C3	1	4.002	7.461	15.881	22.128	5.278
TNF	1	1.59	5.673	4.674	3.367	4.759
LTA	1	4.46	8.097	2.886	7.418	9.864
ACE	1	0.951	1.663	1.242	0.047	0.059
VEGFA	1	1.955	3.439	3.961	0.532	1.012
CD34	1	7.819	8.795	9.587	6.066	1.212
AGTR1	1	5.666	3.809	3.153	2.543	0.713
EDN1	1	4.479	7.693	3.353	1.928	0.715
LIF	1	2.377	2.944	3.393	1.276	14.906
LY96	1	1.503	1.072	3.662	2.667	11.57
MIF	1	1.66	1.303	1.193	1.648	0.462
NFATC3	1	2.967	3.529	2.671	2.228	1.333
NFATC4	1	9.378	8.36	13.102	23.057	6.885
PF4	1	0.237	1.051	0.304	0.727	0.761
SYK	1	2.098	2.155	3.572	1.718	2.277
